# Supplementary material for: Population Demographic History of a Rare and Endangered Tree Magnolia sprengeri Pamp. in East Asia Revealed by Molecular Data and Ecological Niche Analysis
Source: MDPI journal article supplement (doi:10.3390/f12070931), 2021-07-16
Supplement: s1 [file s1]

## Supplementary

**Table S1.** The location and voucher information of *M. sprengeri* samples used in this study.

| P <sup>1</sup> | Location           | Latitude | Longitude | Alt. (m) | N <sup>2</sup> | Collection number          |
|----------------|--------------------|----------|-----------|----------|----------------|----------------------------|
| 1              | Longnan, Gansu     | 33.66298 | 106.37503 | 2220     | 1              | K_ZSZ 845                  |
| 2              | Tongren, Guizhou   | 27.54302 | 108.42152 | 1911     | 3              | K_ZSZ 800,808,851          |
| 3              | Qiandong, Guizhou  | 26.22922 | 108.11905 | 1913     | 5              | K_ZSZ 753,803,804,805, 847 |
| 4              | Tongren, Guizhou   | 27.19493 | 108.03560 | 1719     | 1              | K_ZSZ 783                  |
| 5              | Tongren, Guizhou   | 27.26102 | 108.05311 | 1056     | 3              | K_ZSZ 806,849,850          |
| 6              | Zunyi, Guizhou     | 28.14137 | 107.09382 | 1585     | 5              | K_ZSZ 784,785,786,812, 855 |
| 7              | Tongren, Guizhou   | 27.54680 | 108.38585 | 1558     | 3              | K_ZSZ 801,802,809          |
| 8              | Shennongjia, Hubei | 31.45694 | 110.31537 | 1578     | 1              | K_ZSZ 872                  |
| 9              | Wufeng, Hubei      | 30.27883 | 110.67747 | 1592     | 3              | K_ZSZ 701,702,709          |
| 10             | Wufeng, Hubei      | 30.27391 | 110.64335 | 1371     | 2              | K_ZSZ 703,721              |
| 11             | Wufeng, Hubei      | 30.28387 | 110.46231 | 1328     | 2              | K_ZSZ 712,713              |
| 12             | Wufeng, Hubei      | 30.18847 | 110.56368 | 1204     | 3              | K_ZSZ 707,711,722          |
| 13             | Wufeng, Hubei      | 30.18385 | 110.85734 | 1200     | 4              | K_ZSZ 704,705,706,708      |
| 14             | Wufeng, Hubei      | 30.17791 | 110.86651 | 1004     | 3              | K_ZSZ 710,714,719          |
| 15             | Zhangjiajie, Hunan | 29.46388 | 110.04043 | 1291     | 5              | K_ZSZ 744,745,746,747, 748 |
| 16             | Zhangjiajie, Hunan | 29.04751 | 110.47443 | 1419     | 5              | K_ZSZ 742,743,788,789, 790 |
| 17             | Zhangjiajie, Hunan | 29.04956 | 110.47765 | 842      | 1              | K_ZSZ 569                  |
| 18             | Shangluo, Shaanxi  | 33.81434 | 108.99731 | 1093     | 1              | K_ZSZ 876                  |
| 19             | Baoji, Shaanxi     | 33.72666 | 106.76983 | 1365     | 4              | K_ZSZ 717,874,877,879      |
| 20             | Hanzhong, Shaanxi  | 33.58956 | 107.76553 | 1150     | 3              | K_ZSZ 522,530,844          |
| 21             | Baoji, Shaanxi     | 34.08907 | 107.70639 | 1136     | 1              | K_ZSZ 881                  |
| 22             | Baoji, Shaanxi     | 34.08771 | 107.75167 | 1227     | 3              | K_ZSZ 715,718,875          |
| 23             | Baoji, Shaanxi     | 34.04856 | 107.61392 | 1268     | 1              | K_ZSZ 716                  |



|    |                     |          |           |      |   |                           |
|----|---------------------|----------|-----------|------|---|---------------------------|
| 24 | Ankang, Shaan-xi    | 33.44365 | 108.48758 | 1456 | 2 | K_ZSZ 523,537             |
| 25 | Ankang, Shaan-xi    | 33.44455 | 108.45597 | 2051 | 1 | K_ZSZ 720                 |
| 26 | Ankang, Shaan-xi    | 32.36209 | 109.44273 | 502  | 1 | K_ZSZ 880                 |
| 27 | Ankang, Shaan-xi    | 32.08625 | 109.53163 | 921  | 1 | K_ZSZ 868                 |
| 28 | Chengdu, Si-chuan   | 30.90973 | 103.55639 | 1160 | 1 | K_ZSZ 527                 |
| 29 | Fengjie, Chong-qing | 30.39481 | 109.25114 | 1303 | 5 | K_ZSZ 871,892,893,894,895 |
| 30 | Guangyuan, Sichuan  | 32.41695 | 106.55074 | 1694 | 1 | K_ZSZ 773                 |
| 31 | Jiangyou, Si-chuan  | 31.52290 | 104.39013 | 1580 | 3 | K_ZSZ 526,529,772         |
| 32 | Mianyang, Si-chuan  | 32.65456 | 104.11153 | 1613 | 1 | K_ZSZ 525                 |
| 33 | Mianyang, Si-chuan  | 31.89665 | 104.68127 | 1208 | 1 | K_ZSZ 524                 |
| 34 | Bazhong, Si-chuan   | 30.52463 | 103.20626 | 1639 | 1 | K_ZSZ 528                 |
| 35 | Linan, Zhejiang     | 30.34932 | 119.42419 | 1481 | 1 | K_ZSZ 775                 |
| 36 | Nanchuan, Chongqing | 29.04287 | 107.17184 | 1637 | 5 | K_ZSZ 760,761,762,763,782 |

<sup>1</sup> Populations number; <sup>2</sup> Number of samples.

**Table S2.** Primers used for DNA barcoding studies.

| Region           | Primer | Sequence                                        | Annealing temperature | expected length | Reference                  |
|------------------|--------|-------------------------------------------------|-----------------------|-----------------|----------------------------|
| <i>matK</i>      | 3F     | 5'-CGTACAGTAC<br>TTTT-<br>GTGTTTAC-<br>GAG-3'   | 50 °C                 | 837 bp          | Chao et al., 2014 [1]      |
|                  | 1R     | 5'-ACCCAGTCCA<br>TCTG-<br>GAAATCTT-<br>GGTTC-3' |                       |                 |                            |
| <i>trnH-psbA</i> | psbA-F | 5'-GTTATGCATG<br>AAC-<br>GTAATGCTC-3'           | 58 °C                 | 465 bp          | Sang et al., 1997 [2]      |
|                  | trnH-R | 5'-CGCGCATGGT<br>GGAT-<br>TCACAATCC-3'          |                       |                 |                            |
| <i>rbcL</i>      | F      | 5'-ATGTCACCAC<br>AAACAGA-<br>GACTAAAGC-3'       | 55 °C                 | 553 bp          | Kress & Erickson, 2007 [4] |
|                  | R      | 5'-GTAAAATCAA<br>GTCCACCGCG-3'                  |                       |                 |                            |



**Table S3.** Variable sites of the aligned sequences of the three chloroplast DNA (cpDNA) fragments (*matK*, *trnH-psbA* and *rbcL*) from which six cpDNA haplotypes of *Magnolia sprengeri* were identified.

| cpDNA<br>haplo-<br>types | <i>matK</i> (1-765) <sup>1</sup> |   |   |   | <i>trnH-psbA</i> (766-1126) |   |   |   | <i>rbcL</i> (1127-1650) |   |
|--------------------------|----------------------------------|---|---|---|-----------------------------|---|---|---|-------------------------|---|
|                          | 0                                | 0 | 0 | 0 | 0                           | 0 | 1 | 1 | 1                       | 1 |
|                          | 1                                | 2 | 6 | 7 | 8                           | 9 | 0 | 0 | 2                       | 5 |
|                          | 1                                | 6 | 1 | 5 | 5                           | 8 | 3 | 4 | 9                       | 6 |
|                          | 4                                | 7 | 7 | 4 | 1                           | 1 | 8 | 2 | 6                       | 4 |
| HP1                      | A                                | G | C | T | A                           | G | G | C | A                       | T |
| HP2                      | .                                | . | . | . | T                           | . | . | . | .                       | . |
| HP3                      | .                                | . | . | . | .                           | C | . | . | .                       | . |
| HP4                      | .                                | . | G | . | .                           | . | . | . | .                       | . |
| HP5                      | G                                | A | . | G | .                           | . | A | T | G                       | C |
| HP6                      | .                                | A | . | G | .                           | . | A | T | G                       | C |

<sup>1</sup> The total alignment length was 1,650 bp. The fragments are united with *matK* (765bp), *trnH-psbA* (361bp) and *rbcL* (524bp). Nucleotide position is at the bottom of this column; <sup>2</sup> All haplotype sequences are edited with reference to HP1.

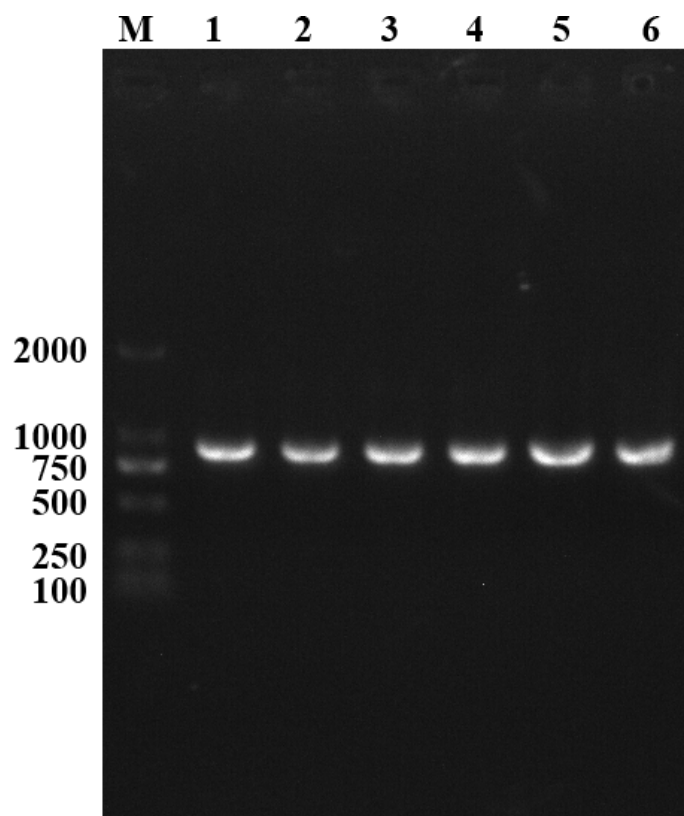

**Figure S1.** Electrophoretic map of *matK*'s primers. M, 2000bp DNA Marker; 1-6, six materials of *M. sprengeri*. The results showed that the primers could amplify the target bands in *M. sprengeri*, the size of which was about 800bp.



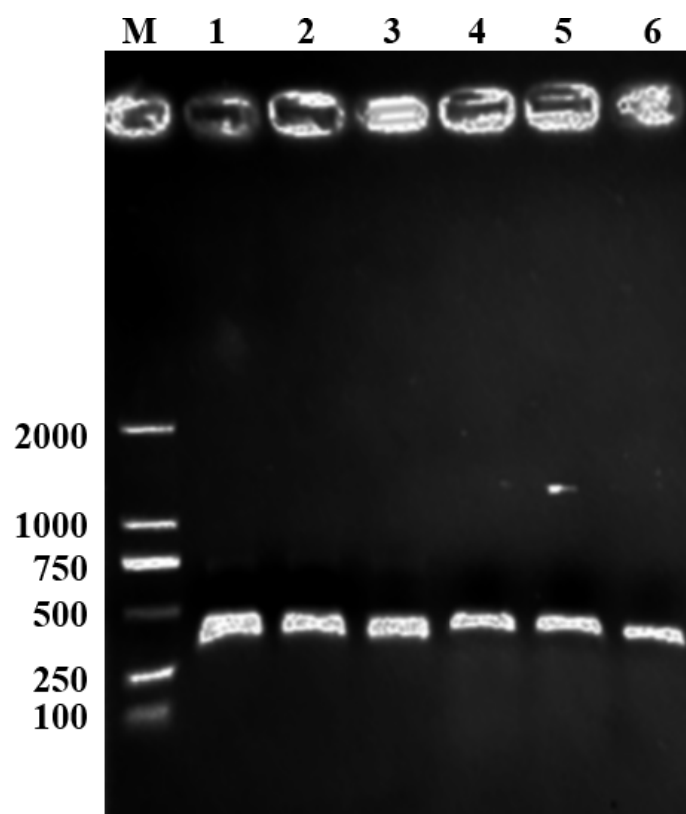

**Figure S2.** Electrophoretic map of *trnH-psbA*'s primers. M, 2000bp DNA Marker; 1-6, six materials of *M. sprengeri*. The results showed that the primers could amplify the target bands in *M. sprengeri*, the size of which was about 450bp.



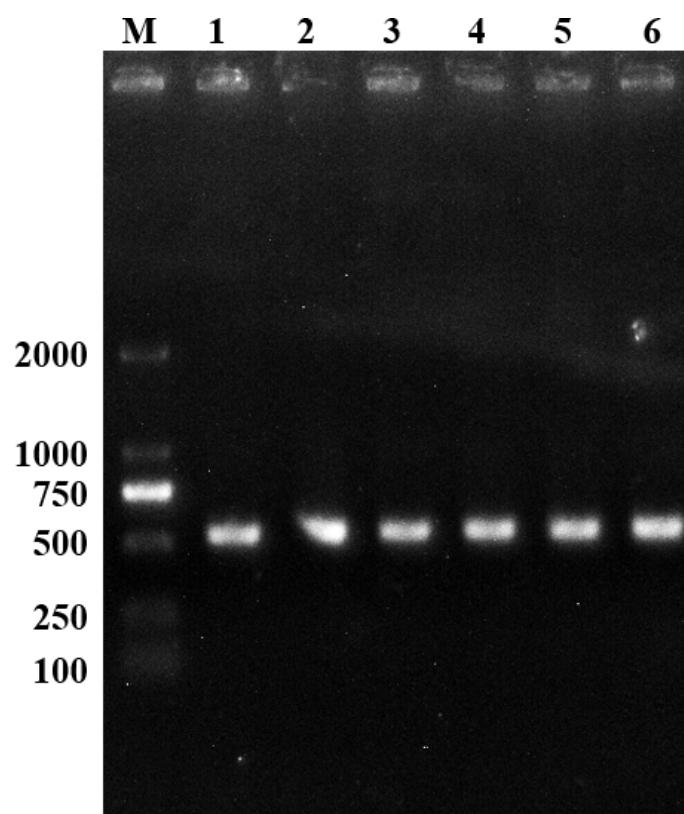

**Figure S3.** Electrophoretic map of *rbcL*'s primers. M, 2000bp DNA Marker; 1-6, six materials of *M. sprengeri*. The results showed that the primers could amplify the target bands in *M. sprengeri*, the size of which was about 550bp.



[illegible]



|        | 1450 | 1460 | 1470 | 1480 | 1490 | 1500 |
|--------|------|------|------|------|------|------|
| SP15-1 | A    | T    | T    | T    | G    | G    |
| SP15-5 | A    | T    | T    | T    | G    | G    |
| SP1-1  | A    | T    | T    | T    | G    | G    |
| SP2-1  | A    | T    | T    | T    | G    | G    |
| SP2-2  | A    | T    | T    | T    | G    | G    |
| SP2-3  | A    | T    | T    | T    | G    | G    |
| SP3-1  | A    | T    | T    | T    | G    | G    |
| SP3-2  | A    | T    | T    | T    | G    | G    |
| SP3-3  | A    | T    | T    | T    | G    | G    |
| SP3-4  | A    | T    | T    | T    | G    | G    |
| SP3-5  | A    | T    | T    | T    | G    | G    |
| SP4-1  | A    | T    | T    | T    | G    | G    |
| SP5-1  | A    | T    | T    | T    | G    | G    |
| SP5-2  | A    | T    | T    | T    | G    | G    |
| SP5-3  | A    | T    | T    | T    | G    | G    |
| SP6-1  | A    | T    | T    | T    | G    | G    |
| SP6-2  | A    | T    | T    | T    | G    | G    |
| SP6-3  | A    | T    | T    | T    | G    | G    |
| SP6-4  | A    | T    | T    | T    | G    | G    |
| SP6-5  | A    | T    | T    | T    | G    | G    |
| SP7-2  | A    | T    | T    | T    | G    | G    |
| SP7-3  | A    | T    | T    | T    | G    | G    |
| SP10-1 | A    | T    | T    | T    | G    | G    |
| SP10-2 | A    | T    | T    | T    | G    | G    |
| SP11-1 | A    | T    | T    | T    | G    | G    |
| SP11-2 | A    | T    | T    | T    | G    | G    |
| SP12-1 | A    | T    | T    | T    | G    | G    |
| SP12-2 | A    | T    | T    | T    | G    | G    |
| SP12-3 | A    | T    | T    | T    | G    | G    |
| SP19-1 | A    | T    | T    | T    | G    | G    |
| SP13-1 | A    | T    | T    | T    | G    | G    |
| SP13-2 | A    | T    | T    | T    | G    | G    |
| SP13-3 | A    | T    | T    | T    | G    | G    |
| SP13-4 | A    | T    | T    | T    | G    | G    |
| SP14-1 | A    | T    | T    | T    | G    | G    |
| SP14-2 | A    | T    | T    | T    | G    | G    |
| SP22-2 | A    | T    | T    | T    | G    | G    |
| SP14-3 | A    | T    | T    | T    | G    | G    |
| SP15-2 | A    | T    | T    | T    | G    | G    |
| SP15-3 | A    | T    | T    | T    | G    | G    |
| SP16-1 | A    | T    | T    | T    | G    | G    |
| SP16-2 | A    | T    | T    | T    | G    | G    |
| SP16-3 | A    | T    | T    | T    | G    | G    |
| SP16-4 | A    | T    | T    | T    | G    | G    |
| SP16-5 | A    | T    | T    | T    | G    | G    |
| SP18-1 | A    | T    | T    | T    | G    | G    |
| SP19-2 | A    | T    | T    | T    | G    | G    |
| SP19-3 | A    | T    | T    | T    | G    | G    |
| SP19-4 | A    | T    | T    | T    | G    | G    |
| SP20-1 | A    | T    | T    | T    | G    | G    |
| SP24-1 | A    | T    | T    | T    | G    | G    |
| SP26-1 | A    | T    | T    | T    | G    | G    |
| SP36-4 | A    | T    | T    | T    | G    | G    |
| SP36-5 | A    | T    | T    | T    | G    | G    |
| SP34-1 | A    | T    | T    | T    | G    | G    |
| SP36-1 | A    | T    | T    | T    | G    | G    |
| SP36-2 | A    | T    | T    | T    | G    | G    |
| SP36-3 | A    | T    | T    | T    | G    | G    |
| SP32-1 | A    | T    | T    | T    | G    | G    |
| SP33-1 | A    | T    | T    | T    | G    | G    |
| SP31-2 | A    | T    | T    | T    | G    | G    |
| SP31-3 | A    | T    | T    | T    | G    | G    |
| SP30-1 | A    | T    | T    | T    | G    | G    |
| SP31-1 | A    | T    | T    | T    | G    | G    |
| SP29-4 | A    | T    | T    | T    | G    | G    |
| SP29-5 | A    | T    | T    | T    | G    | G    |
| SP29-1 | A    | T    | T    | T    | G    | G    |
| SP29-2 | A    | T    | T    | T    | G    | G    |
| SP27-1 | A    | T    | T    | T    | G    | G    |
| SP28-1 | A    | T    | T    | T    | G    | G    |
| SP24-2 | A    | T    | T    | T    | G    | G    |
| SP25-1 | A    | T    | T    | T    | G    | G    |
| SP21-1 | A    | T    | T    | T    | G    | G    |
| SP22-1 | A    | T    | T    | T    | G    | G    |
| SP20-2 | A    | T    | T    | T    | G    | G    |
| SP20-3 | A    | T    | T    | T    | G    | G    |
| SP29-3 | A    | T    | T    | T    | G    | G    |
| SP23-1 | A    | T    | T    | T    | G    | G    |
| SP22-3 | A    | T    | T    | T    | G    | G    |
| SP9-1  | A    | T    | T    | T    | G    | G    |
| SP9-2  | A    | T    | T    | T    | G    | G    |
| SP9-3  | A    | T    | T    | T    | G    | G    |
| SP8-1  | A    | T    | T    | T    | G    | G    |
| SP17-1 | A    | T    | T    | T    | G    | G    |
| SP35-1 | A    | T    | T    | T    | G    | G    |
| SP7-1  | A    | T    | T    | T    | G    | G    |



[illegible]



[illegible]



[illegible]



**Figure S4.** All alignments sequences of *M. sprengeri* used in this study. SP represents *M. sprengeri*. The total alignment length was 1,650 bp, and 10 nucleotide substitutions revealed six haplotypes (Table S3, HP1-6).

## References

1. Jiang, C.; Cao, L.; Yuan, Y.; Chen, M.; Jin, Y.; Huang, L. Barcoding melting curve analysis for rapid, sensitive, and discriminating authentication of saffron (*Crocus sativus* L.) from its adulterants. *Biomed Res. Int.* **2014**, *2014*, 809037.
2. Swift, J.F.; Lance, R.F.; Guan, X.; Britzke, E.R.; Lindsay, D.L.; Edwards, C.E. Multifaceted DNA metabarcoding: Validation of a noninvasive, next-generation approach to studying bat populations. *Evol. Appl.* **2018**, *11*, 1120–1138.
3. Tate, J.A.; Simpson, B.B. Breeding system evolution in *Tarasa* (Malvaceae) and selection for reduced pollen grain size in the polyploid species. *Am. J. Bot.* **2004**, *91*, 207–213.
4. Kress, W.J.; Erickson, D.L. A two-locus global DNA barcode for land plants: the coding *rbcL* gene complements the non-coding *trnH-psbA* spacer region. *PLoS One.* **2007**, *2*, e508.
